# Supplementary figures and images for: Seasonal variations of triple oxygen isotopic compositions ofatmospheric sulfate, nitrate and ozone at Dumont d'Urville, coastalAntarctica
Source: Copernicus journal article supplement (doi:10.5194/acp-2016-930), 2016-10-24

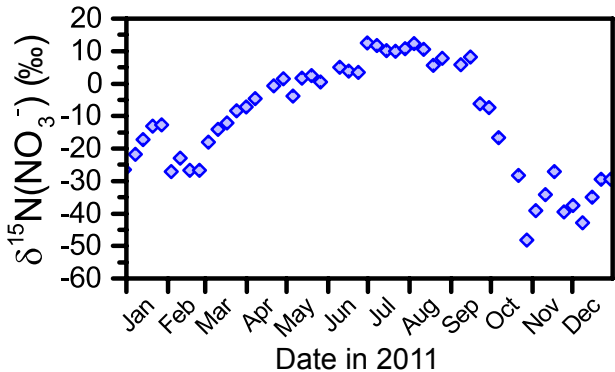

Supplement: Supplementary file 1 [file acp-2016-930-supplement.zip]
